# Supplementary material for: Efficacy of melatonin in animal models of intracerebral hemorrhage: a systematic review and meta-analysis
Source: publisher site journal article supplement (doi:10.18632/aging.202457), 2021-01-27
Supplement: Supplementary file [file aging-v13i2-202457-supplementary-material-SD1.pdf]

**SUPPLEMENTARY FIGURES**

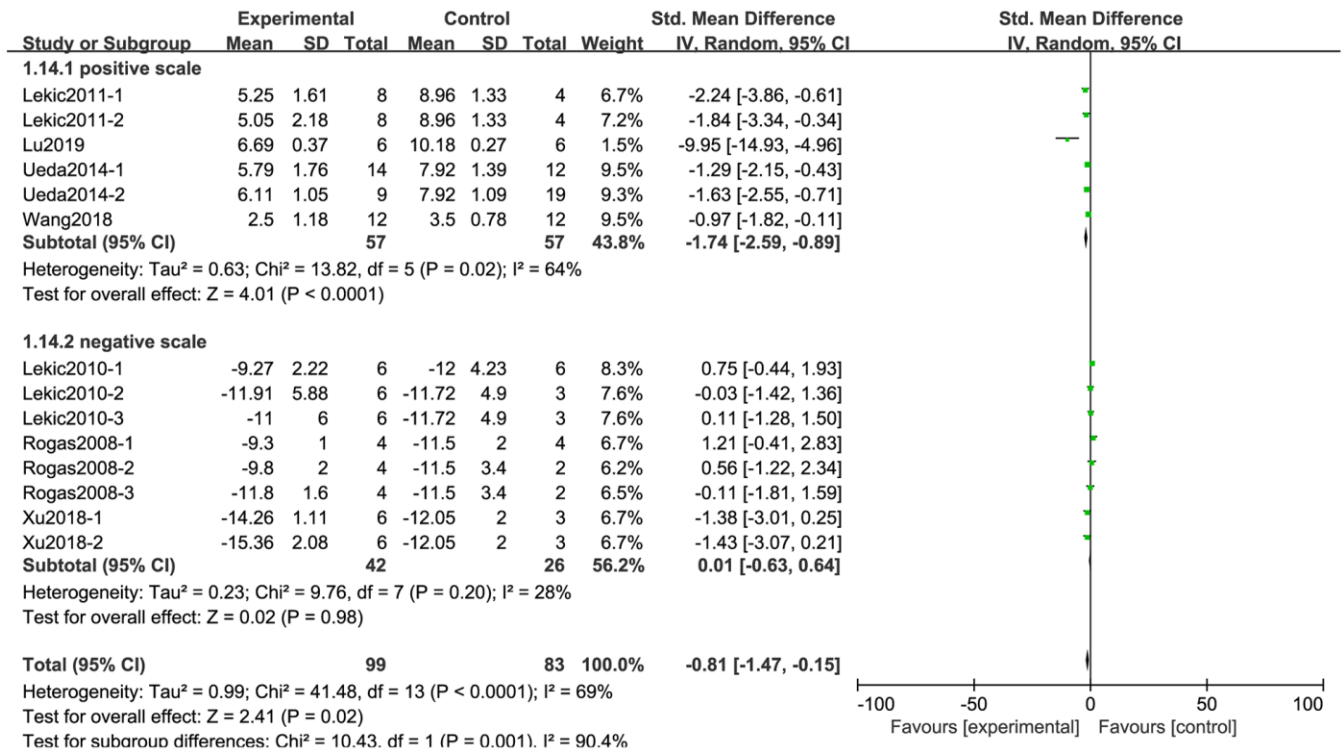

**Supplementary Figure 1. Subgroup analysis by neurobehavioral scales.**

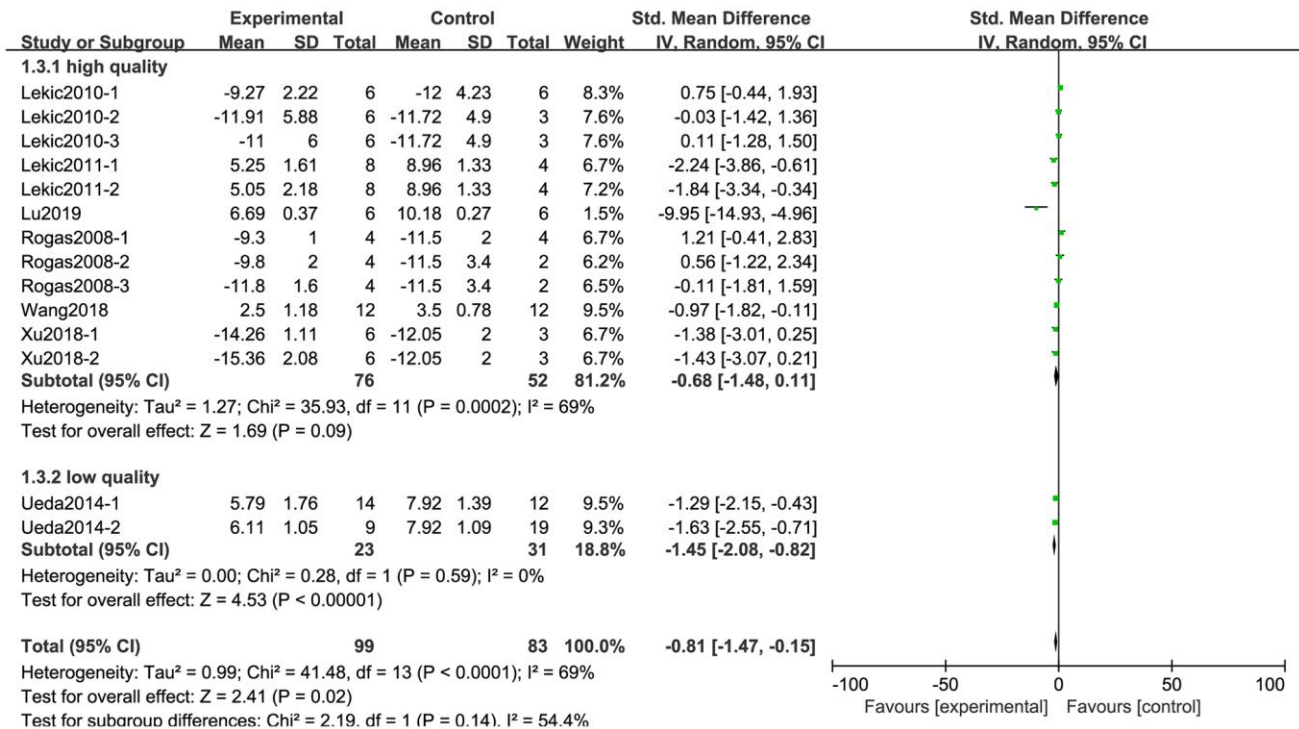

Supplementary Figure 2. Subgroup analysis by study quality.

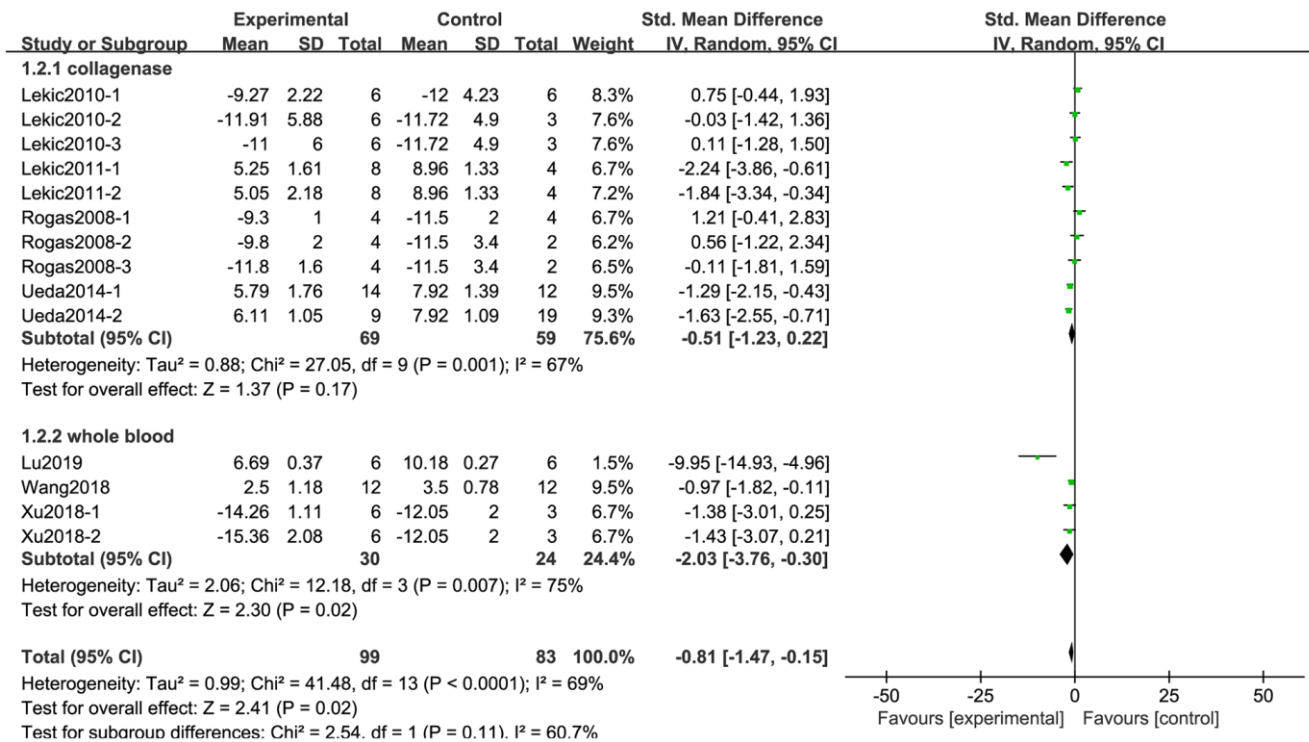

Supplementary Figure 3. Subgroup analysis by methods to induce ICH.

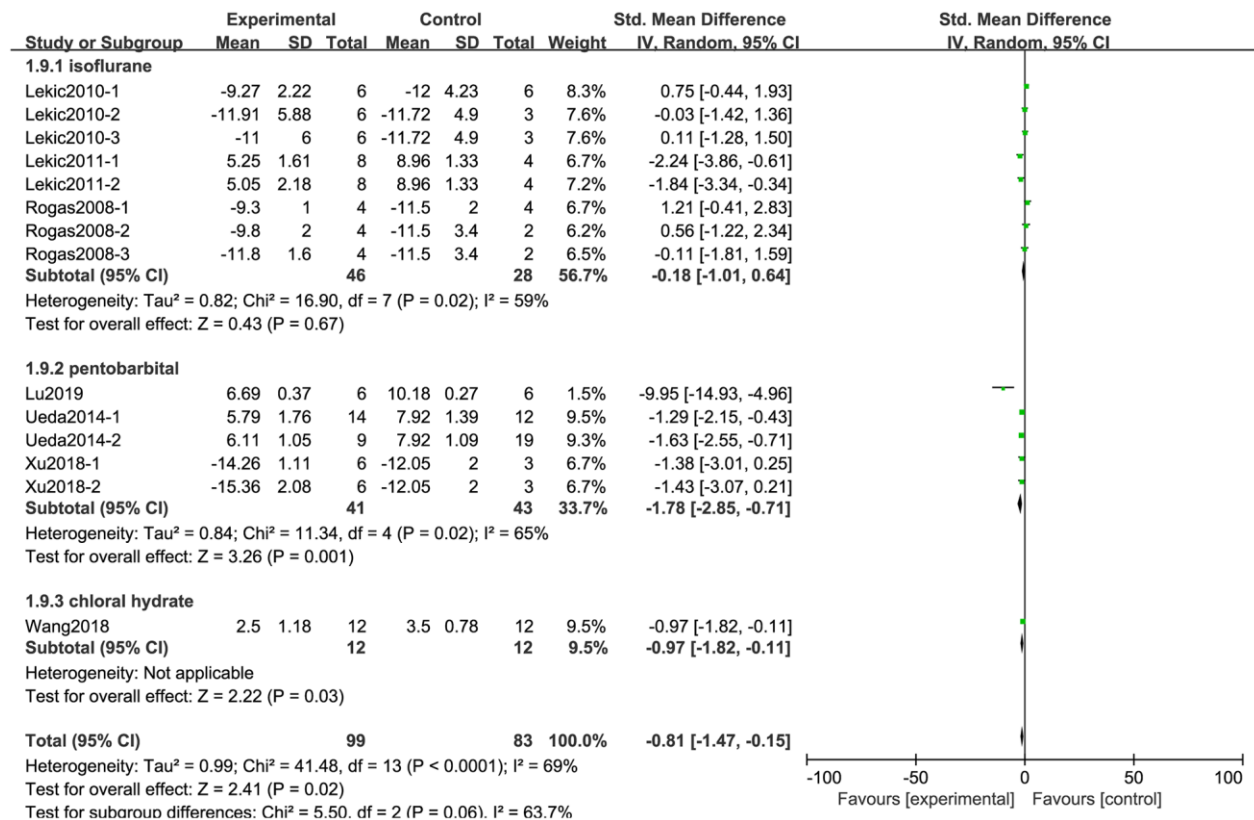

Supplementary Figure 4. Subgroup analysis by different anaesthetics.

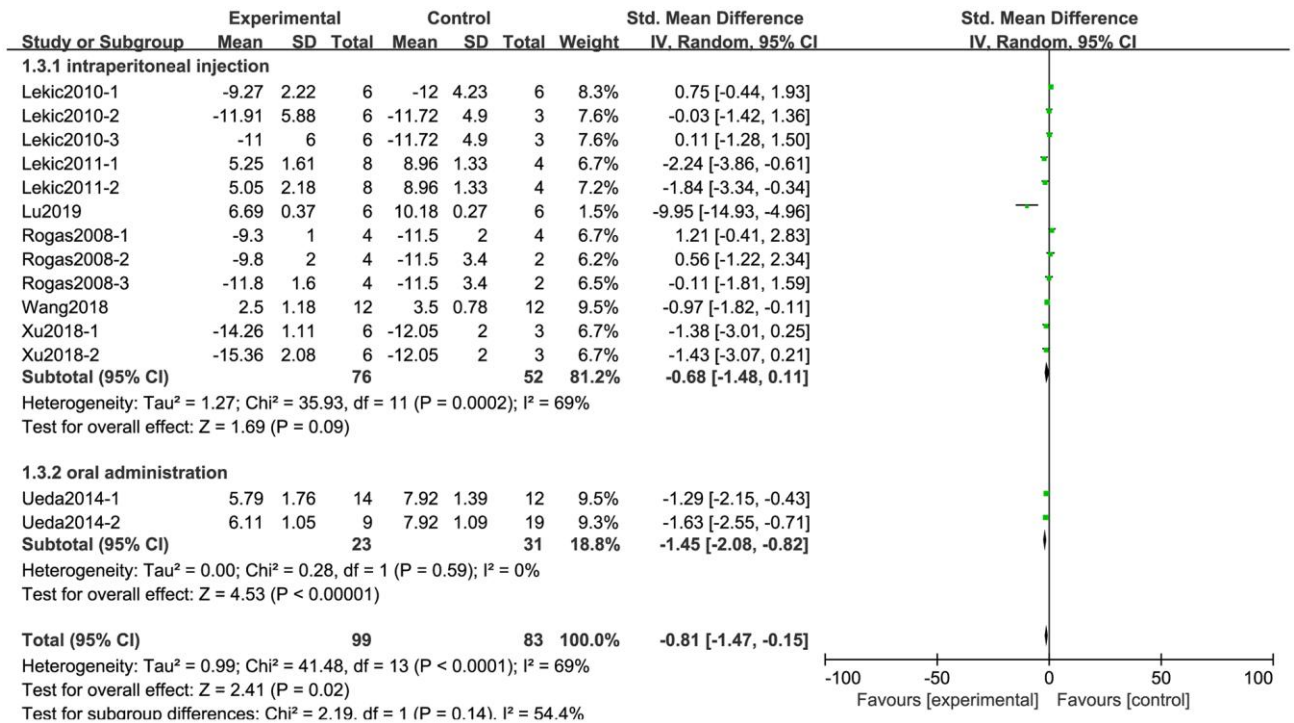

Supplementary Figure 5. Subgroup analysis by routes of injection.

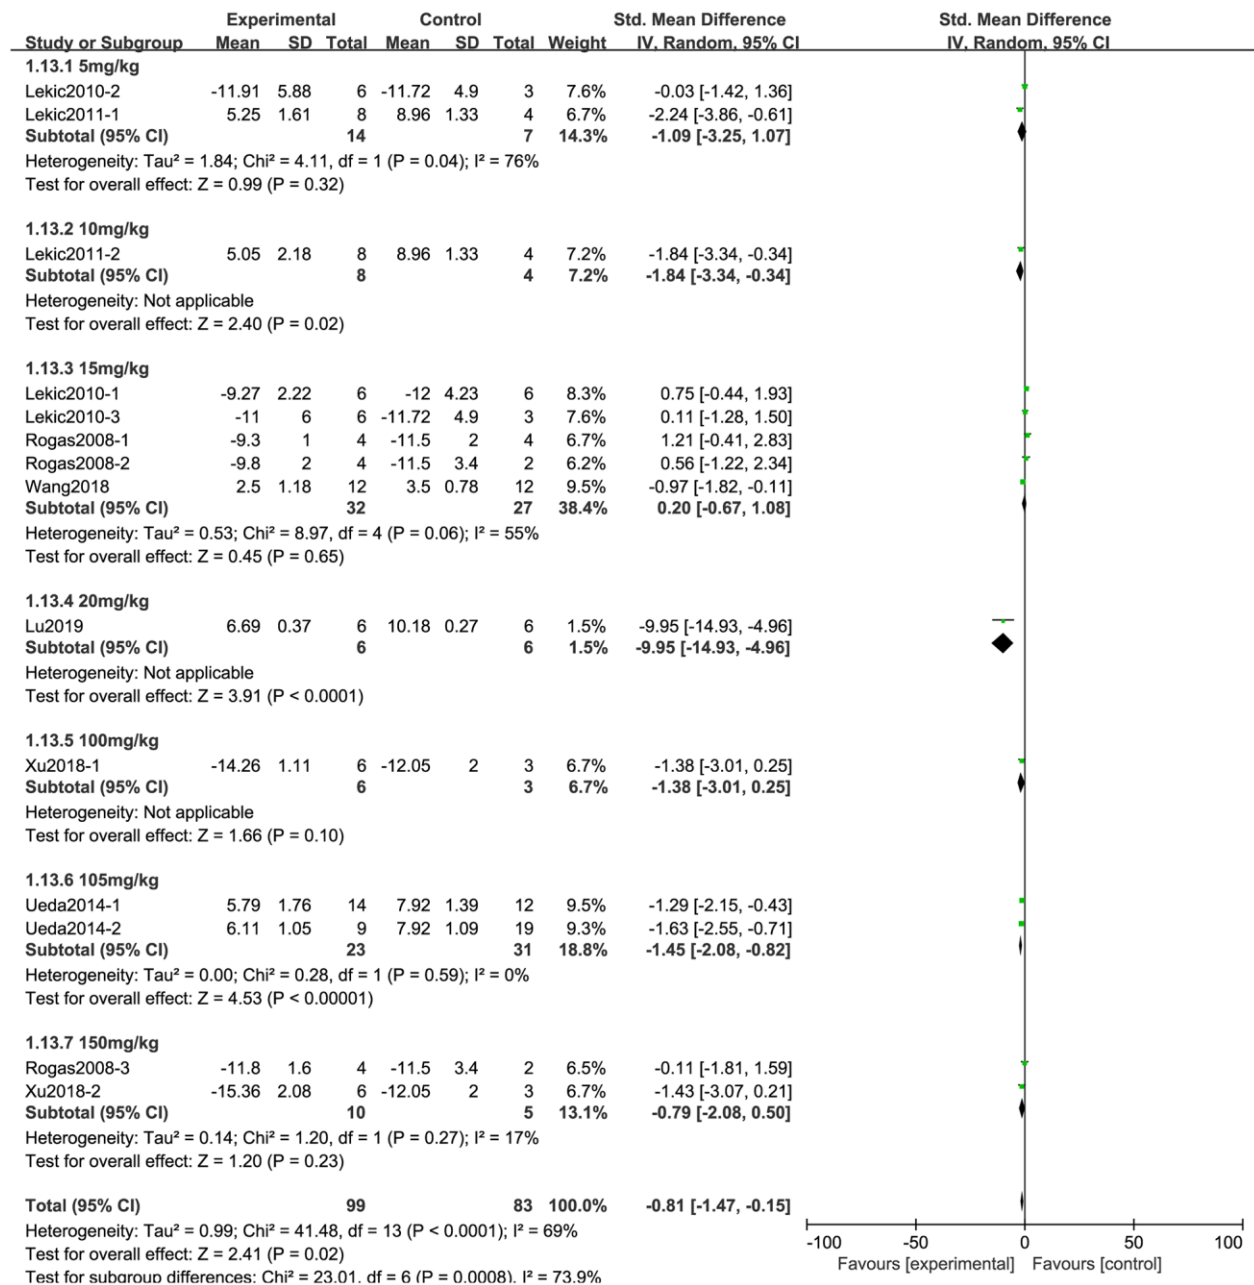

Supplementary Figure 6. Subgroup analysis by different dosages.

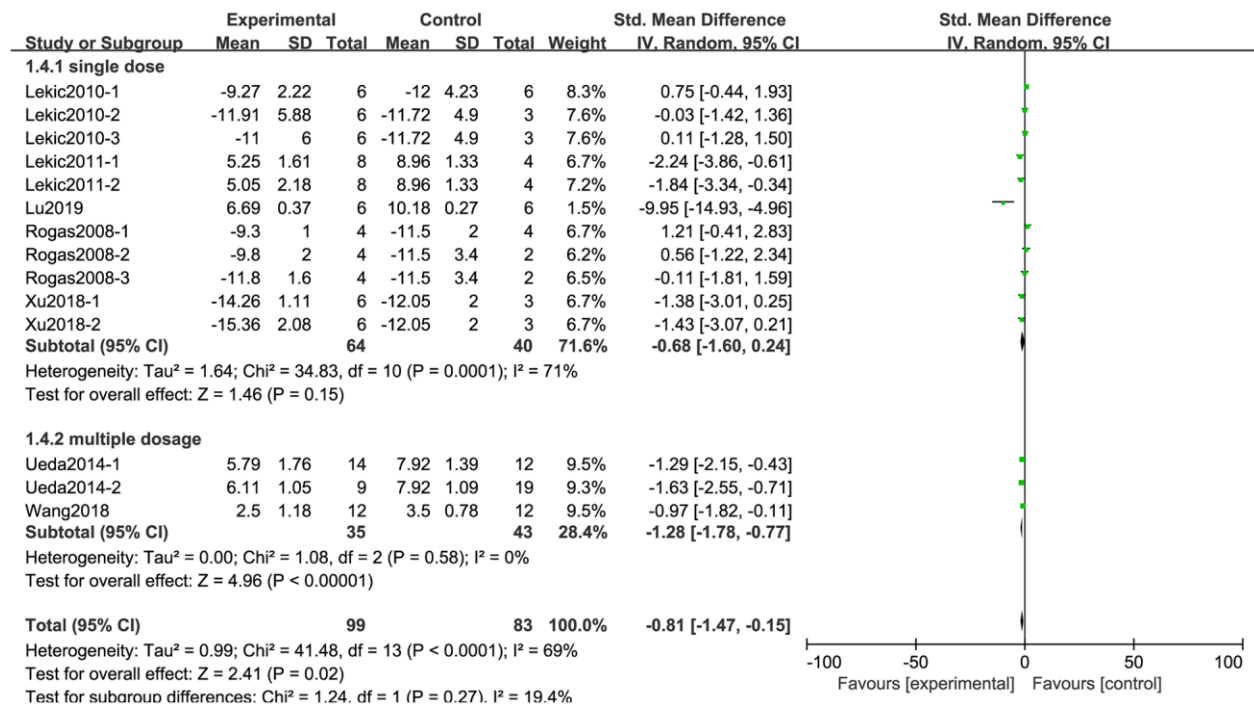

Supplementary Figure 7. Subgroup analysis by times of melatonin administration.

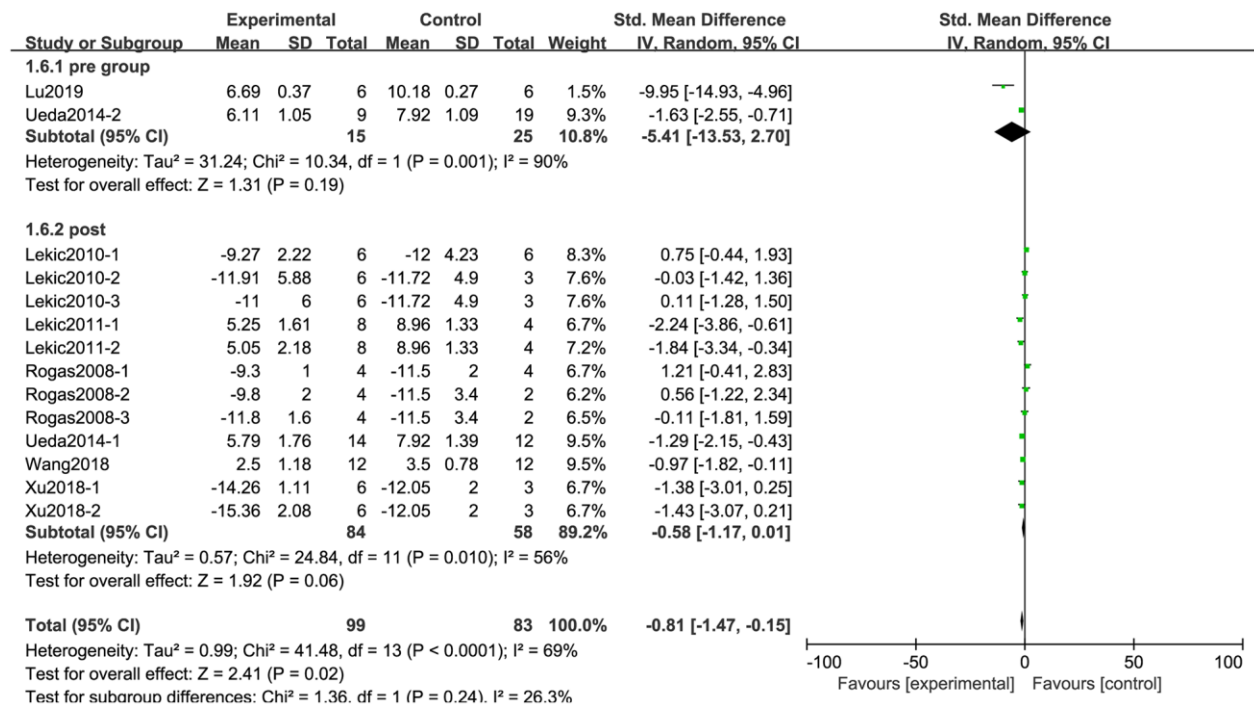

Supplementary Figure 8. Subgroup analysis by time administration.
